# Supplementary material for: Specificity and Origin of the Stability of the Sr Isotopic Ratio in Champagne Wines
Source: MDPI journal article supplement (doi:10.3390/molecules26165104), 2021-08-23
Supplement: s1 [file s1]

## Supplementary Material:

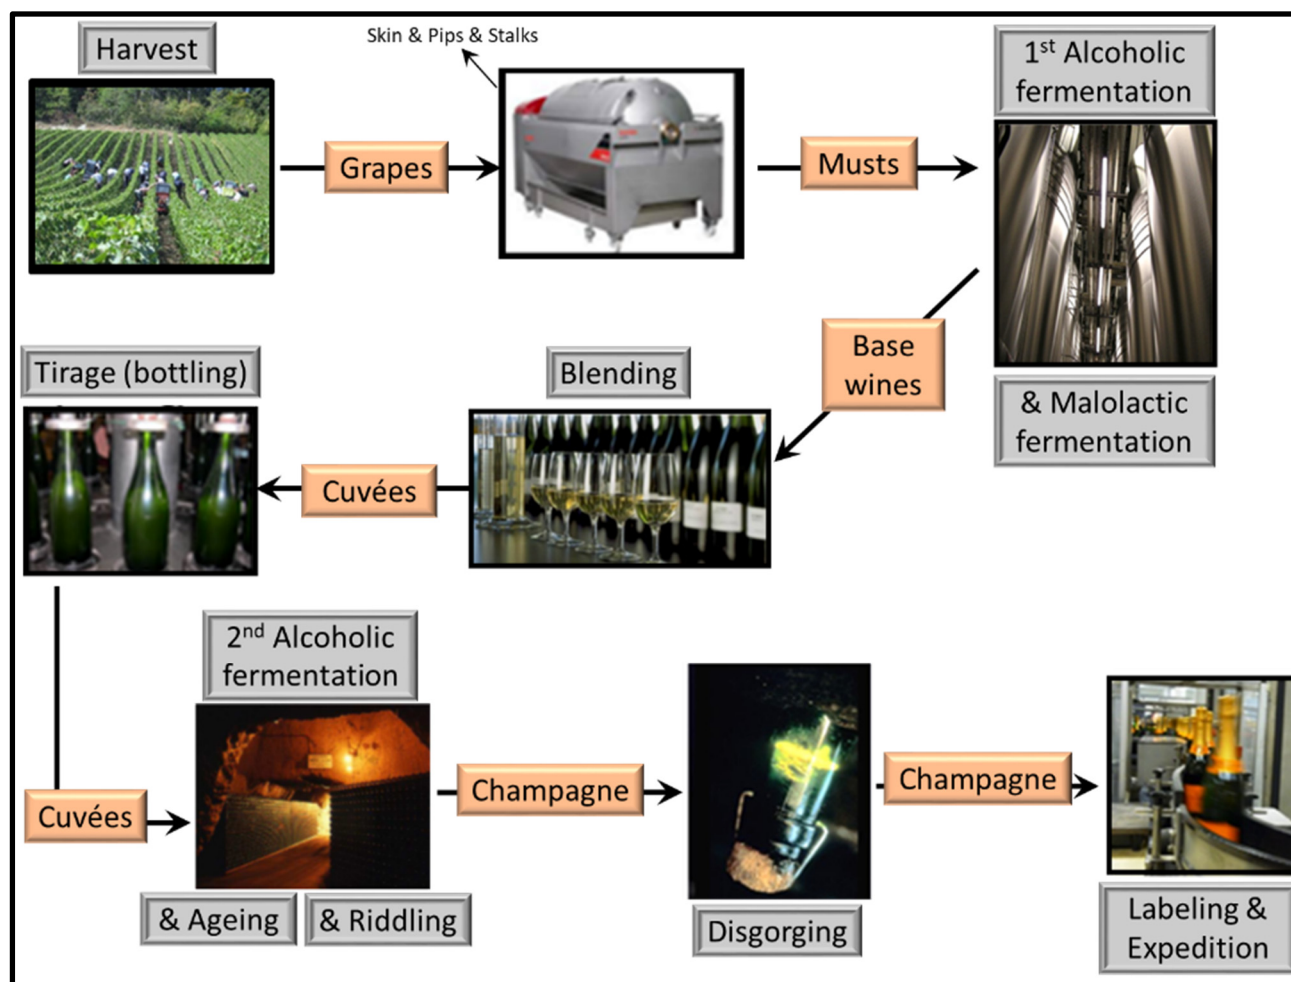

**Figure S1:** Traditional and typical steps for the elaboration process of the champagne – “Méthode traditionnelle”.

| 2 types of samples         |          | Number of Samples                 |                    |           |              |
|----------------------------|----------|-----------------------------------|--------------------|-----------|--------------|
|                            |          | Grape                             | Must               | Base wine | Champagne    |
| <b>Whole AOC Champagne</b> |          | 0                                 | 25                 | 11        | 39           |
| Years                      |          | /                                 | 2018               | 2019      | 1983 to 2016 |
| Blending                   |          | /                                 | /                  | Yes       | Yes          |
| Area                       |          | /                                 | from 3 departments |           |              |
| <b>Small Plots</b>         | <b>A</b> | 1                                 | 1                  | 1         | 1            |
|                            | <b>B</b> | 1                                 | 1                  | 1         | 1            |
| Years                      |          | 2019                              | 2019               | 2019      | 2000         |
| Blending                   |          | No                                |                    |           |              |
| Area                       |          | A = 1,8 hectare ; B = 0,7 hectare |                    |           |              |

**Table S1:** Description of the different samples analyzed for this study.

| MC-ICP-MS                                                 |                                                             |
|-----------------------------------------------------------|-------------------------------------------------------------|
| General Parameters                                        |                                                             |
| Plasma gas flow rate (L.min <sup>-1</sup> )               | 13                                                          |
| Auxiliary flow rate (L.min <sup>-1</sup> )                | 0,8                                                         |
| RF power (W)                                              | 1300                                                        |
| Acceleration voltage (V)                                  | 6000                                                        |
| Mass resolution                                           | Low                                                         |
| Sr measurments                                            |                                                             |
| Plasma mode                                               | Wet                                                         |
| Sample Introduction                                       | 200 µL.min <sup>-1</sup> nebulizer + cyclonic spray chamber |
| Interface sampler cone                                    | Ni, type A                                                  |
| Interface skimmer cone                                    | Ni, type A                                                  |
| Sensitivity (V <sub>88Sr</sub> /ppm <sub>Total Sr</sub> ) | 34 to 44                                                    |
| Aquisition                                                | 600 s                                                       |
| Uptake flow rate (mL.min <sup>-1</sup> )                  | 0,2                                                         |
| Blank                                                     | OPZ aquired during 60s                                      |

**Table S2:** Operating conditions for the MC-ICP-MS for Sr isotopic analysis.
